# Supplementary material
Source: PubMed Central journal article supplement (PMC8961449)

**Figure S1, Related to Figure 1**

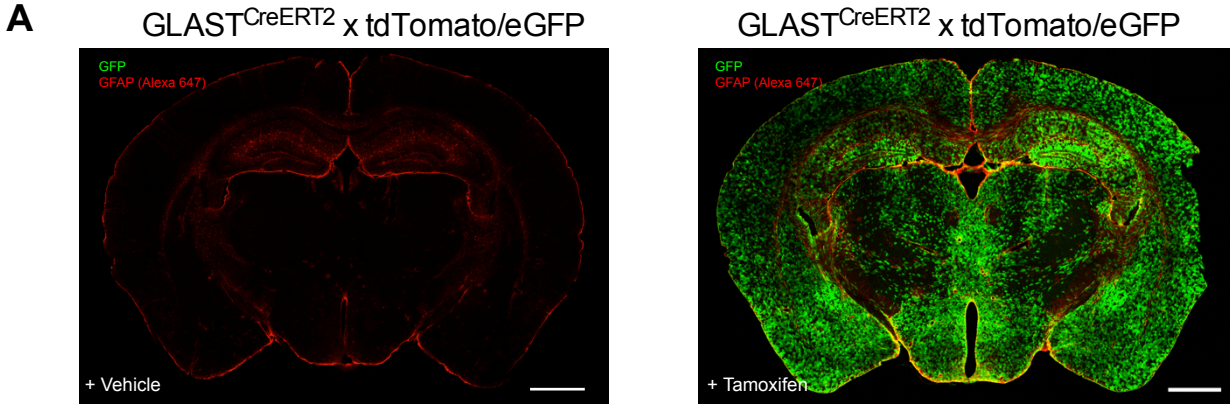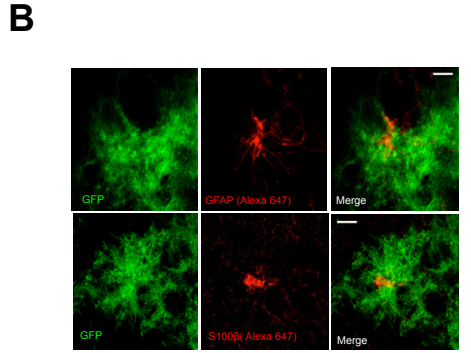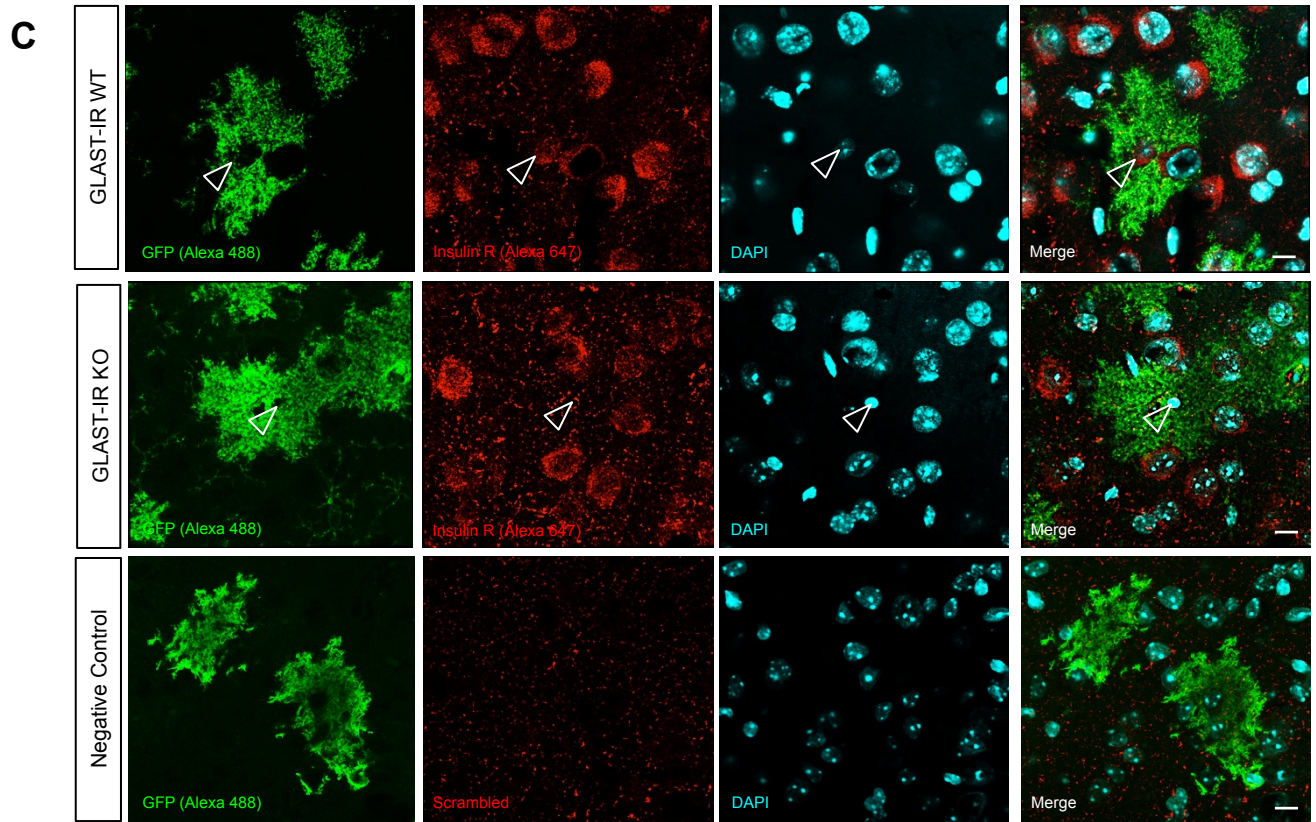

Supplement: NIHMS1785959-supplement-figureS1.pdf [file NIHMS1785959-supplement-figureS1.pdf]

**Figure S2, Related to Figure 1**

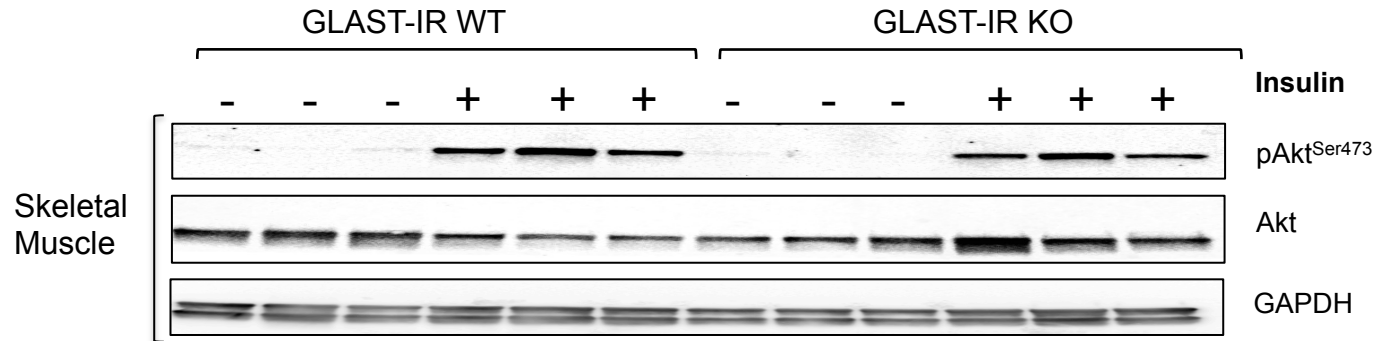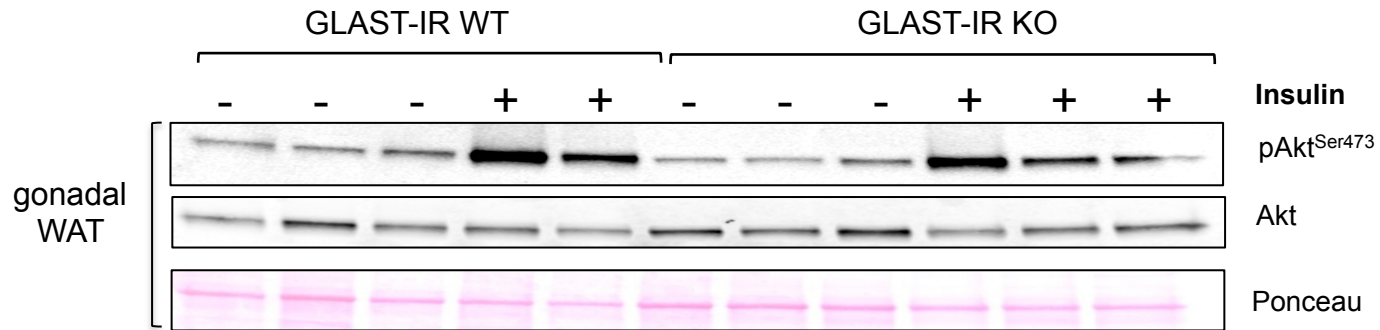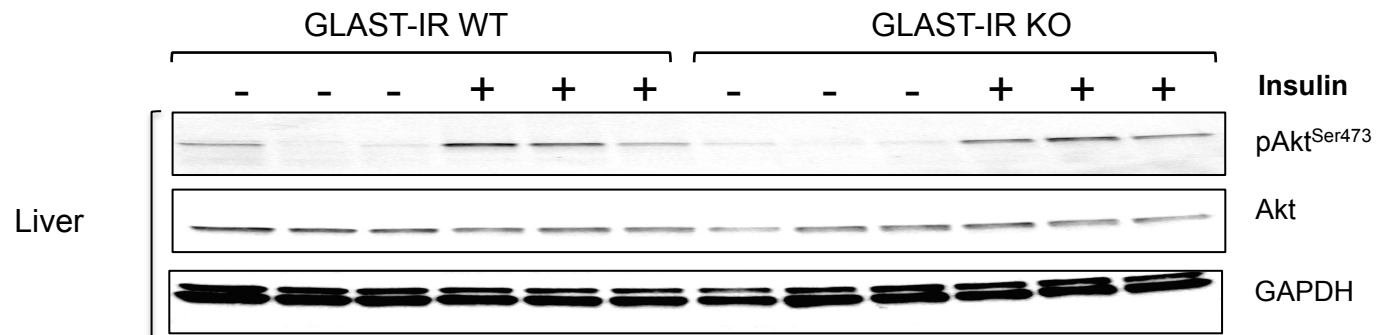

Supplement: NIHMS1785959-supplement-figureS2.pdf [file NIHMS1785959-supplement-figureS2.pdf]

**Figure S3, Related to Figure 1, Figure 2, Figure 4, Figure 5 and Figure 7**

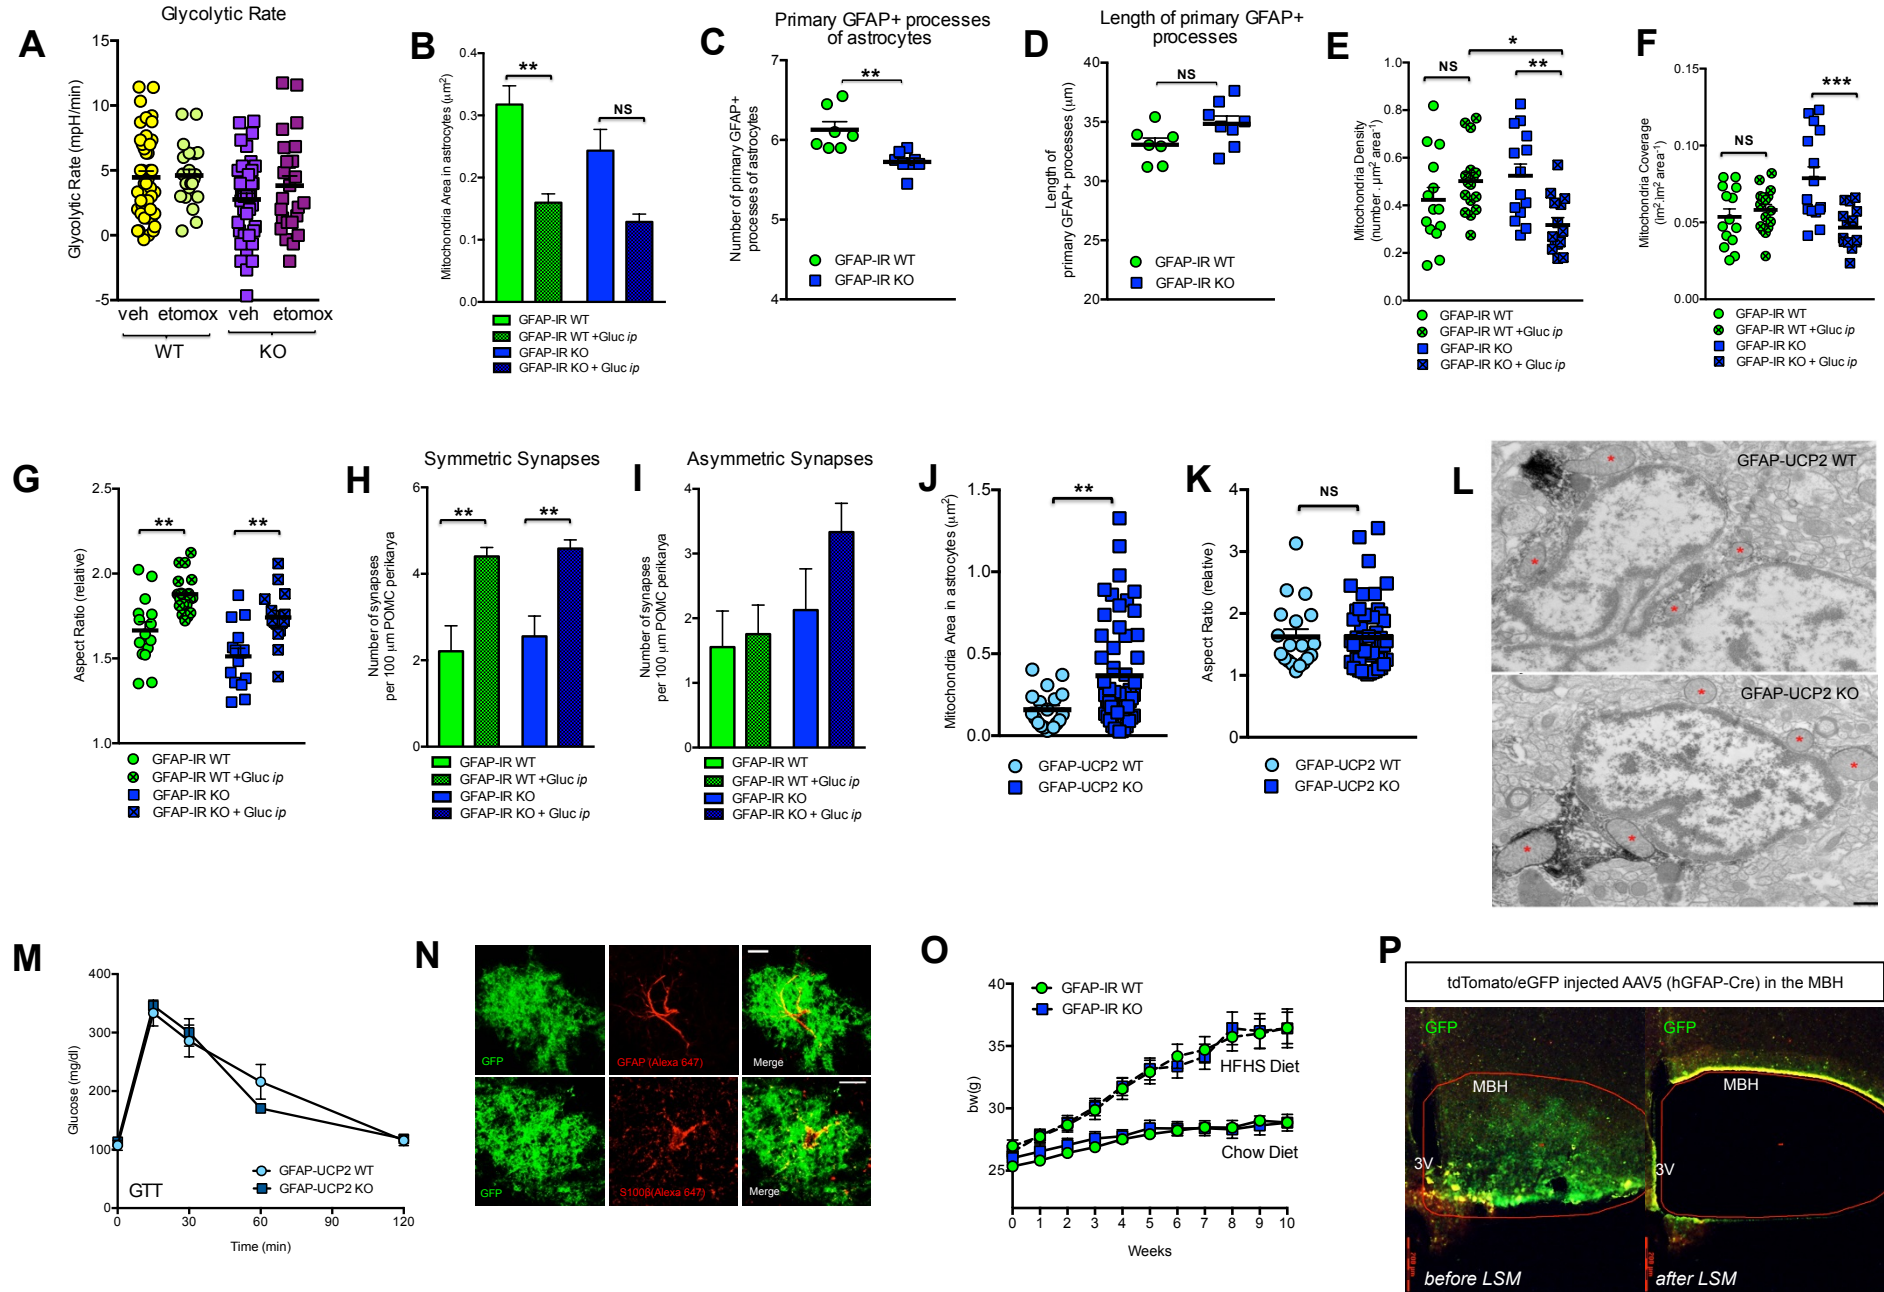

Supplement: NIHMS1785959-supplement-figureS3.pdf [file NIHMS1785959-supplement-figureS3.pdf]
